# Supplementary material for: Passive smoking and risk of pancreatic cancer: an updated systematic review and meta-analysis
Source: PeerJ journal article supplement (doi:10.7717/peerj.18017), 2024-10-08
Supplement: Raw_data.xlsx [file Raw_data.xlsx]

## Sheet: passive smoking-PC
	Study	Studytype	Disease	Origin	OR	95%CI LL	95%CI UL
②	Nishino et al 2001	Prospective cohort study	PC	Asia	1.2	0.45	3.1
⑲	Villeneuve et al 2004 (child only)	Case-control study	PC	America	1.37	0.46	4.07
⑲	Villeneuve et al 2004 (adult only)	Case-control study	PC	America	1.01	0.41	2.5
⑲	Villeneuve et al 2004 (child and adult)	Case-control study	PC	America	1.21	0.6	2.44
⑥	Gallicchio et al 2006 (1963 cohort)	Retrospective cohort study	PC	America	1.1	0.4	2.8
⑥	Gallicchio et al 2006 (1975 cohort)	Retrospective cohort study	PC	America	0.9	0.4	2.3
⑮	Lo et al 2007	Case-control study	PC	Africa	6	2.4	14.8
⑨	Hassan et al 2007	Case-control study	PC	America	1.3	0.9	1.7
⑤	Bao et al 2009 (from mother)	Prospective cohort study	PC	America	1.42	1.07	1.89	parental/maternal
⑤	Bao et al 2009 (from father)	Prospective cohort study	PC	America	0.97	0.77	1.21
⑤	Bao et al 2009 (from unknown person)	Prospective cohort study	PC	America	1	0.68	1.48
⑦	Heinen et al 2010	Retrospective cohort study	PC	Europe	0.9	0.54	1.5
⑭	Vrieling et al 2010 (during childhood)	Prospective cohort study	PC	Europe	1.33	0.86	2.07
⑭	Vrieling et al 2010 ( at home and/or at work)	Prospective cohort study	PC	Europe	1.54	1	2.39
⑰	Chuang et al 2011	Prospective cohort study	PC	Europe	1.32	0.85	2.04
⑪	Tranah et al 2011 (Childhood household exposure)	Case-control study	PC	America	0.99	0.8	1.2
⑪	Tranah et al 2011 (Adulthood household exposure)	Case-control study	PC	America	1.2	0.96	1.5
⑪	Tranah et al 2011 (Adulthood workplace exposure)	Case-control study	PC	America	1.1	0.86	1.3
⑬	Ding et al 2015 (Mother)	Case-control study	PC	Asia	1.56	1.13	1.98
⑬	Ding et al 2015 (Father)	Case-control study	PC	Asia	0.98	0.76	1.17
⑬	Ding et al 2015 (Both parents)	Case-control study	PC	Asia	0.97	0.83	1.26	parental/maternal
⑱	Andersson et al 2016 (For <10 years)	Prospective cohort study	PC	Europe	1.44	0.86	2.41
⑱	Andersson et al 2016 (For 10–20 years)	Prospective cohort study	PC	Europe	1.4	0.84	2.34
⑱	Andersson et al 2016 (For >20 years)	Prospective cohort study	PC	Europe	2.03	1.37	3.02
①	Montes et al 2020 (One of the parents)	Case-control study	PC	Europe	1.24	1.03	1.49
①	Montes et al 2020 (Both parents)	Case-control study	PC	Europe	1.07	0.81	1.42
⑧	Vedie et al 2023a	Prospective cohort study	PC	Europe	1.47	1.08	2
⑧	Vedie et al 2023b	Prospective cohort study	PC	Europe	1.16	0.91	1.47

## Sheet: passive smoking-PC (2)
	Study	Studytype	Disease	Origin	OR	95%CI LL	95%CI UL
②	Nishino et al 2001	Cohort study	PC	Asia	1.2	0.45	3.1	9
⑲	Villeneuve et al 2004 (child only)	Case-control study	PC	America	1.37	0.46	4.07
⑲	Villeneuve et al 2004 (adult only)	Case-control study	PC	America	1.01	0.41	2.5
⑲	Villeneuve et al 2004 (child and adult)	Case-control study	PC	America	1.21	0.6	2.44
⑥	Gallicchio et al 2006 (1963 cohort)	Cohort study	PC	America	1.1	0.4	2.8	15/19
⑥	Gallicchio et al 2006 (1975 cohort)	Cohort study	PC	America	0.9	0.4	2.3
⑮	Lo et al 2007	Case-control study	PC	Africa	6	2.4	14.8
⑨	Hassan et al 2007	Case-control study	PC	America	1.3	0.9	1.7
⑤	Bao et al 2009 (from mother)	Cohort study	PC	America	1.42	1.07	1.89	24
⑤	Bao et al 2009 (from father)	Cohort study	PC	America	0.97	0.77	1.21
⑤	Bao et al 2009 (from unknown person)	Cohort study	PC	America	1	0.68	1.48
⑦	Heinen et al 2010	Cohort study	PC	Europe	0.9	0.54	1.5	16.3
⑭	Vrieling et al 2010 (during childhood)	Cohort study	PC	Europe	1.33	0.86	2.07	8.9
⑭	Vrieling et al 2010 ( at home and/or at work)	Cohort study	PC	Europe	1.54	1	2.39
⑰	Chuang et al 2011	Cohort study	PC	Europe	1.32	0.85	2.04	10
⑪	Tranah et al 2011 (Childhood household exposure)	Case-control study	PC	America	0.99	0.8	1.2
⑪	Tranah et al 2011 (Adulthood household exposure)	Case-control study	PC	America	1.2	0.96	1.5
⑪	Tranah et al 2011 (Adulthood workplace exposure)	Case-control study	PC	America	1.1	0.86	1.3
⑬	Ding et al 2015 (Mother)	Case-control study	PC	Asia	1.56	1.13	1.98
⑬	Ding et al 2015 (Father)	Case-control study	PC	Asia	0.98	0.76	1.17
⑬	Ding et al 2015 (Both parents)	Case-control study	PC	Asia	0.97	0.83	1.26	parental/maternal
⑱	Andersson et al 2016 (For <10 years)	Cohort study	PC	Europe	1.44	0.86	2.41
⑱	Andersson et al 2016 (For 10–20 years)	Cohort study	PC	Europe	1.4	0.84	2.34
⑱	Andersson et al 2016 (For >20 years)	Cohort study	PC	Europe	2.03	1.37	3.02
①	Montes et al 2020 (One of the parents)	Case-control study	PC	Europe	1.24	1.03	1.49
①	Montes et al 2020 (Both parents)	Case-control study	PC	Europe	1.07	0.81	1.42
⑧	Vedie et al 2023a	Cohort study	PC	Europe	1.47	1.08	2	24
⑧	Vedie et al 2023b	Cohort study	PC	Europe	1.16	0.91	1.47

## Sheet: passive smoking-frequency
	Study	Frequency	OR	95%CI LL	95%CI UL
⑨	Hassan et al 2007 (Childhood)	Occasionally/Seldom/Few times per week	1.2	0.8	1.9
⑨	Hassan et al 2007 (Adulthood at home)	Occasionally/Seldom/Few times per week	1.6	1.02	2.5
⑨	Hassan et al 2007 (Adulthood at work)	Occasionally/Seldom/Few times per week	0.9	0.7	1.4
⑨	Hassan et al 2007 (Childhood)	Regularly/Daily	1.3	0.9	1.7
⑨	Hassan et al 2007 (Adulthood at home)	Regularly/Daily	1.3	0.96	1.9
⑨	Hassan et al 2007 (Adulthood at work)	Regularly/Daily	1.4	0.96	1.9
⑤	Bao et al 2009	Occasionally/Seldom/Few times per week	1.11	0.81	1.52
⑤	Bao et al 2009 (work or home)	Regularly/Daily	1.01	0.72	1.4
⑤	Bao et al 2009 (work and home)	Regularly/Daily	0.97	0.63	1.51
⑭	Vrieling et al 2010 (Seldom)	Occasionally/Seldom/Few times per week	0.71	0.34	1.5
⑭	Vrieling et al 2010 (Few times per week)	Occasionally/Seldom/Few times per week	0.74	0.31	1.78
⑭	Vrieling et al 2010 (Daily for few hours)	Regularly/Daily	1.33	0.58	3.07
⑭	Vrieling et al 2010 (Daily for few hours)	Regularly/Daily	2.61	0.96	7.1
⑰	Chuang et al 2011	Occasionally/Seldom/Few times per week	1	0.47	2.12
⑰	Chuang et al 2011	Regularly/Daily	2.09	1.14	3.84

## Sheet: passive smoking-smoking status
	Study	Smoking status	OR	95%CI LL	95%CI UL
⑥	Gallicchio et al 2006 (1963 cohort, non-current smoker)	Never or past smoker	1.9	0.8	4.2
⑥	Gallicchio et al 2006 (1963 cohort, current smoker)	Current smoker	2	1	4.1
⑥	Gallicchio et al 2006 (1975 cohort, non-current smoker)	Never or past smoker	1.6	0.9	2.8
⑥	Gallicchio et al 2006 (1975 cohort, current smoker)	Current smoker	1.8	1.1	3.1
⑤	Bao et al 2009 (from mother)	Never or past smoker	1.52	0.97	2.39
⑤	Bao et al 2009 (from father)	Never or past smoker	0.76	0.54	1.07
⑤	Bao et al 2009 (unknown)	Never or past smoker	0.64	0.31	1.34
⑦	Heinen et al 2010	Never or past smoker	0.9	0.54	1.5
⑭	Vrieling et al 2010 (during childhood)	Never or past smoker	1.33	0.86	2.07
⑭	Vrieling et al 2010 ( at home and/or at work)	Never or past smoker	1.54	1	2.39
⑬	Ding et al 2015 (Mother)	Never or past smoker	1.56	1.13	1.98
⑬	Ding et al 2015 (Father)	Never or past smoker	0.98	0.76	1.17
⑬	Ding et al 2015 (Both parents)	Never or past smoker	0.97	0.83	1.26
⑧	Vedie et al 2023 (Childhood)	Never or past smoker	1.41	1.01	1.96
⑧	Vedie et al 2023 (Adulthood)	Never or past smoker	1.16	0.91	1.49
⑧	Vedie et al 2023 (Childhood)	Current smoker	2.8	1.42	5.52
⑧	Vedie et al 2023 (Adulthood)	Current smoker	1.68	1.1	2.57

## Sheet: passive smoking-household membe
	Study	Number of smoking members	OR	95%CI LL	95%CI UL
②	Nishino et al 2001	One household member	1.2	0.45	3.1
⑤	Bao et al 2009 (from mother)	One household member	1.42	1.07	1.89
⑤	Bao et al 2009 (from father)	One household member	0.97	0.77	1.21
⑬	Ding et al 2015 (mother)	One household member	1.56	1.13	1.98
⑬	Ding et al 2015 (father)	One household member	0.98	0.76	1.17
⑬	Ding et al 2015 (both parents)	Two or more members	0.97	0.83	1.26
①	Montes et al 2020 (One of the parents)	One household member	1.24	1.03	1.49
①	Montes et al 2020 (Both parents)	Two or more members	1.07	0.81	1.42

## Sheet: childhood-adulthood
	Study	Exposing time of passive smoking	OR	95%CI LL	95%CI UL
⑲	Villeneuve et al 2004 (child only)	Childhood	1.37	0.46	4.07
⑲	Villeneuve et al 2004 (adult only)	Adulthood	1.01	0.41	2.5
⑨	Hassan et al 2007 (Occasionally)	Childhood	1.2	0.8	1.9
⑨	Hassan et al 2007 (Regularly)	Childhood	1.3	0.9	1.7
⑨	Hassan et al 2007 (Occasionally at home)	Adulthood	1.6	1.02	2.5
⑨	Hassan et al 2007 (Regularly at home)	Adulthood	1.3	0.96	1.9
⑨	Hassan et al 2007 (Occasionally at work)	Adulthood	0.9	0.7	1.4
⑨	Hassan et al 2007 (Regularly at work)	Adulthood	1.4	0.96	1.9
⑭	Vrieling et al 2010 (during childhood)	Childhood	1.33	0.86	2.07
⑰	Chuang et al 2011 (Few times during a week)	Childhood	1	0.47	2.12
⑰	Chuang et al 2011 (Daily)	Childhood	2.09	1.14	3.84
⑪	Tranah et al 2011 (Childhood household exposure)	Childhood	0.99	0.8	1.2
⑪	Tranah et al 2011 (Adulthood household exposure)	Adulthood	1.2	0.96	1.5
⑪	Tranah et al 2011 (Adulthood workplace exposure)	Adulthood	1.1	0.86	1.3
①	Montes et al 2020 (One of the parents)	Childhood	1.24	1.03	1.49
①	Montes et al 2020 (Both parents)	Childhood	1.07	0.81	1.42
⑧	Vedie et al 2023	Childhood	1.47	1.08	2
⑧	Vedie et al 2023	Adulthood	1.16	0.91	1.47

## Sheet: sensitivity
	Study	Studytype	Disease	Origin	OR	95%CI LL	95%CI UL
②	Nishino et al 2001	Prospective cohort study	PC	Asia	1.2	0.45	3.1
⑲	Villeneuve et al 2004 (child only)	Case-control study	PC	America	1.37	0.46	4.07
⑲	Villeneuve et al 2004 (adult only)	Case-control study	PC	America	1.01	0.41	2.5
⑲	Villeneuve et al 2004 (child and adult)	Case-control study	PC	America	1.21	0.6	2.44
⑥	Gallicchio et al 2006 (1963 cohort)	Retrospective cohort study	PC	America	1.1	0.4	2.8
⑥	Gallicchio et al 2006 (1975 cohort)	Retrospective cohort study	PC	America	0.9	0.4	2.3
⑮	Lo et al 2007	Case-control study	PC	Africa	6	2.4	14.8
⑨	Hassan et al 2007	Case-control study	PC	America	1.3	0.9	1.7
⑤	Bao et al 2009 (from mother)	Prospective cohort study	PC	America	1.42	1.07	1.89
⑤	Bao et al 2009 (from father)	Prospective cohort study	PC	America	0.97	0.77	1.21
⑤	Bao et al 2009 (from unknown person)	Prospective cohort study	PC	America	1	0.68	1.48
⑦	Heinen et al 2010	Retrospective cohort study	PC	Europe	0.9	0.54	1.5
⑭	Vrieling et al 2010 (during childhood)	Prospective cohort study	PC	Europe	1.33	0.86	2.07
⑭	Vrieling et al 2010 ( at home and/or at work)	Prospective cohort study	PC	Europe	1.54	1	2.39
⑰	Chuang et al 2011	Prospective cohort study	PC	Europe	1.32	0.85	2.04
⑪	Tranah et al 2011 (Childhood household exposure)	Case-control study	PC	America	0.99	0.8	1.2
⑪	Tranah et al 2011 (Adulthood household exposure)	Case-control study	PC	America	1.2	0.96	1.5
⑪	Tranah et al 2011 (Adulthood workplace exposure)	Case-control study	PC	America	1.1	0.86	1.3
⑬	Ding et al 2015 (Mother)	Case-control study	PC	Asia	1.56	1.13	1.98
⑬	Ding et al 2015 (Father)	Case-control study	PC	Asia	0.98	0.76	1.17
⑬	Ding et al 2015 (Both parents)	Case-control study	PC	Asia	0.97	0.83	1.26
⑱	Andersson et al 2016 (For <10 years)	Prospective cohort study	PC	Europe	1.44	0.86	2.41
⑱	Andersson et al 2016 (For 10–20 years)	Prospective cohort study	PC	Europe	1.4	0.84	2.34
⑱	Andersson et al 2016 (For >20 years)	Prospective cohort study	PC	Europe	2.03	1.37	3.02
①	Montes et al 2020 (One of the parents)	Case-control study	PC	Europe	1.24	1.03	1.49
①	Montes et al 2020 (Both parents)	Case-control study	PC	Europe	1.07	0.81	1.42
⑧	Vedie et al 2023a	Prospective cohort study	PC	Europe	1.47	1.08	2
⑧	Vedie et al 2023b	Prospective cohort study	PC	Europe	1.16	0.91	1.47
